# Supplementary material
Source: bioRxiv or medRxiv preprint supplement (https://www.biorxiv.org/highwire/filestream/112490/field_highwire_adjunct_files/18/355669-9.pdf)

**A**

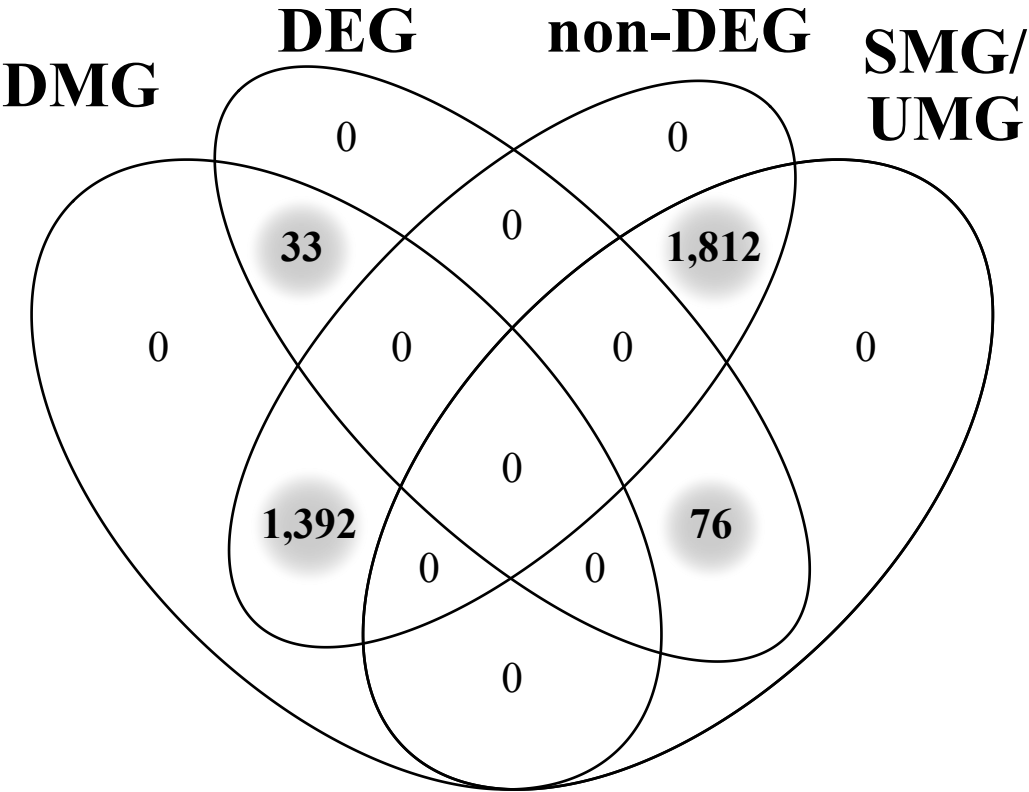

Supplement: Supplementary file [file 355669-9.pdf]
